# Supplementary material
Source: PubMed Central journal article supplement (PMC4515413)
Supplement: NIHMS656264-supplement-SDC_3.pdf [file NIHMS656264-supplement-SDC_3.pdf]

**Supplementary Digital Content: Figure 1.** Association\* between all-cause mortality and overall physical activity (sum of exercise and non-exercise activity) estimated by restricted cubic splines, by sex, the NIH-AARP Diet and Health Study

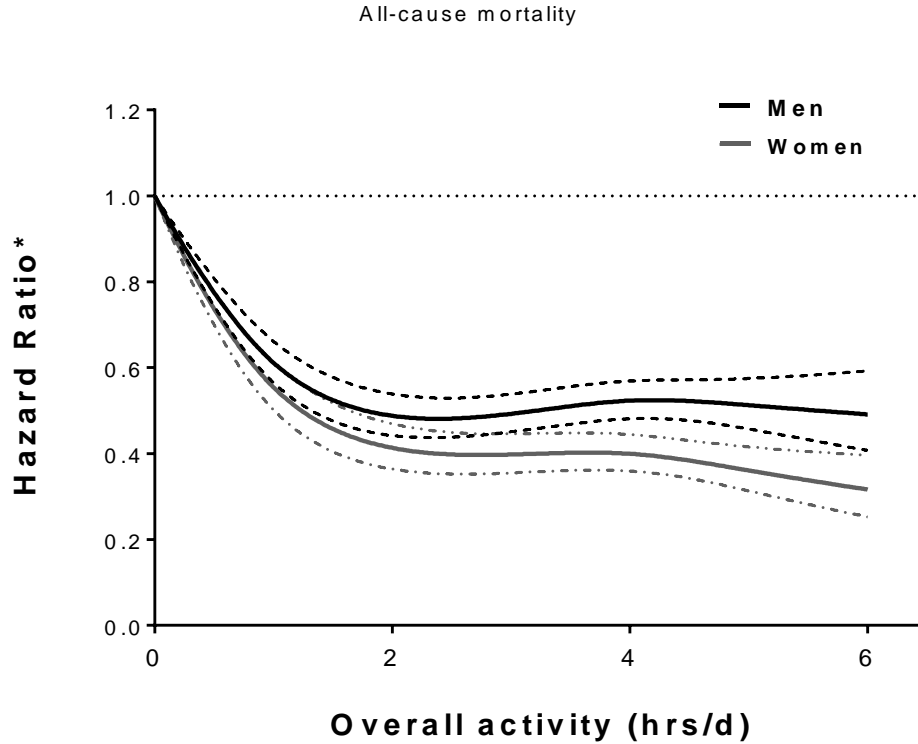

\*Values are Hazard Ratios and 95% Confidence Intervals adjusted for Age (years), Education (< 12 yrs, high school graduate, some college, college graduate, unknown), Smoking history (never, stopped 10+ , stopped 5-9, stopped 1-4 years, stopped < 1 year, current smoker, unknown), Sleep duration (< 4, 4-5.9, 6-7.9, 8-9.9, 10+ hours/day, unknown), Overall health (excellent, very good, good, fair, poor, unknown), and Body Mass Index (< 25, 25-29.9, 30+ kg/m<sup>2</sup>, unknown). To fit the splines knots were placed at intervals of 0.5 to 1 hr increments over the range of the exposure and data were trimmed at approximately the 95<sup>th</sup> percentile of the distribution.
