# Supplementary material
Source: PubMed Central journal article supplement (PMC4515413)
Supplement: NIHMS656264-supplement-SDC_4.pdf [file NIHMS656264-supplement-SDC_4.pdf]

**Supplementary Digital Content: Figure 2.** Physical activity energy expenditure (MET-hrs/d) in less and more active participants, by sex, the NIH-AARP Diet and Health Study

Values are median and the inter-quartile range (25th and 75th percentiles)

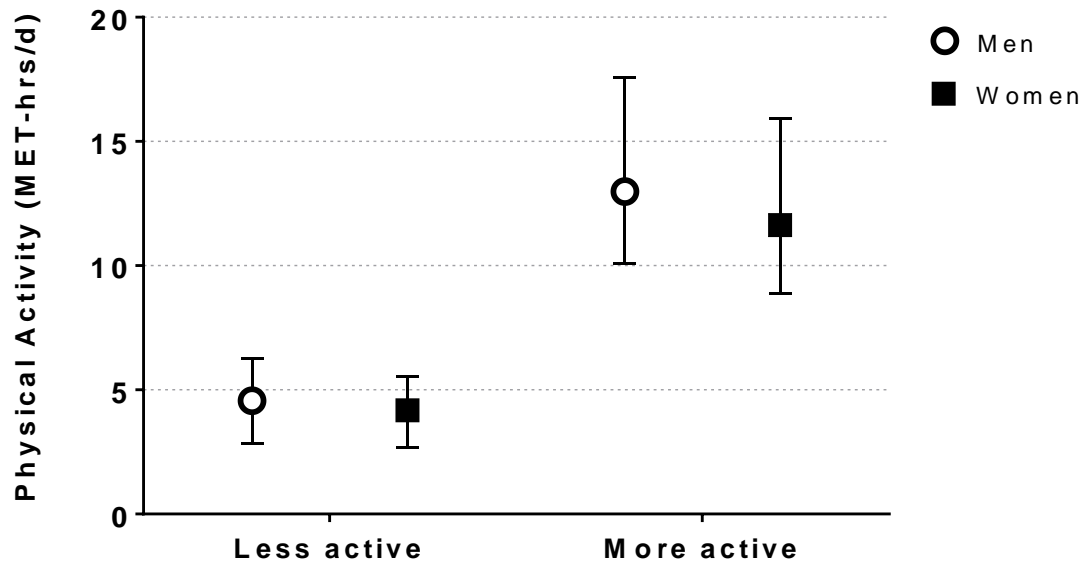

Less active = < 2 hrs/d of overall physical activity, n=69,606

More active = 2+ hrs/d of overall physical activity, n=85,008
