# Supplementary material
Source: PubMed Central journal article supplement (PMC4515413)
Supplement: NIHMS656264-supplement-SDC_6.pdf [file NIHMS656264-supplement-SDC_6.pdf]

**Supplementary Digital Content: Table 1A.** Partition and isotemporal substitution models for all-cause mortality in less active participants, overall and by sex - the NIH-AARP Diet & Health Study

**Less Overall Physical Activity (< 2 hrs/d)**

**Variable Group 1**

|                          | Sedentary    |              | Exercise     |              | Non-exercise |              | Total time   |              |
|--------------------------|--------------|--------------|--------------|--------------|--------------|--------------|--------------|--------------|
|                          | HR           | 95% CI       |
| <b>ALL Participants</b>  |              |              |              |              |              |              |              |              |
| Partition                | <b>1.023</b> | 1.016, 1.030 | <b>0.594</b> | 0.547, 0.646 | <b>0.713</b> | 0.675, 0.754 | -            |              |
| Replacement/substitution | -            |              | <b>0.581</b> | 0.535, 0.631 | <b>0.698</b> | 0.660, 0.737 | <b>1.023</b> | 1.016, 1.030 |
| <b>MEN</b>               |              |              |              |              |              |              |              |              |
| Partition                | <b>1.020</b> | 1.010, 1.029 | <b>0.619</b> | 0.563, 0.682 | <b>0.715</b> | 0.665, 0.769 | -            |              |
| Replacement/substitution | -            |              | <b>0.608</b> | 0.552, 0.669 | <b>0.701</b> | 0.652, 0.754 | <b>1.020</b> | 1.010, 1.029 |
| <b>WOMEN</b>             |              |              |              |              |              |              |              |              |
| Partition                | <b>1.028</b> | 1.017, 1.039 | <b>0.534</b> | 0.453, 0.630 | <b>0.705</b> | 0.647, 0.768 | -            |              |
| Replacement/substitution | -            |              | <b>0.520</b> | 0.441, 0.613 | <b>0.686</b> | 0.629, 0.748 | <b>1.028</b> | 1.017, 1.039 |

**Variable Group 2**

|                          | Sedentary    |              | Exercise     |              | Household    |              | Lawn/garden  |              | Other walking |              | Total time   |              |
|--------------------------|--------------|--------------|--------------|--------------|--------------|--------------|--------------|--------------|---------------|--------------|--------------|--------------|
|                          | HR           | 95% CI       | HR            | 95% CI       | HR           | 95% CI       |
| <b>ALL Participants</b>  |              |              |              |              |              |              |              |              |               |              |              |              |
| Partition                | <b>1.021</b> | 1.014, 1.028 | <b>0.592</b> | 0.545, 0.643 | <b>0.816</b> | 0.758, 0.877 | <b>0.504</b> | 0.441, 0.576 | <b>0.678</b>  | 0.580, 0.791 | -            |              |
| Replacement/substitution | -            |              | <b>0.580</b> | 0.534, 0.630 | <b>0.799</b> | 0.742, 0.859 | <b>0.494</b> | 0.432, 0.564 | <b>0.664</b>  | 0.568, 0.775 | <b>1.021</b> | 1.014, 1.028 |
| <b>MEN</b>               |              |              |              |              |              |              |              |              |               |              |              |              |
| Partition                | <b>1.018</b> | 1.009, 1.027 | <b>0.617</b> | 0.561, 0.679 | <b>0.811</b> | 0.729, 0.901 | <b>0.554</b> | 0.478, 0.642 | <b>0.758</b>  | 0.625, 0.920 | -            |              |
| Replacement/substitution | -            |              | <b>0.606</b> | 0.551, 0.667 | <b>0.796</b> | 0.716, 0.886 | <b>0.544</b> | 0.470, 0.631 | <b>0.745</b>  | 0.614, 0.904 | <b>1.018</b> | 1.009, 1.027 |
| <b>WOMEN</b>             |              |              |              |              |              |              |              |              |               |              |              |              |
| Partition                | <b>1.026</b> | 1.015, 1.037 | <b>0.543</b> | 0.460, 0.640 | <b>0.811</b> | 0.734, 0.897 | <b>0.342</b> | 0.248, 0.470 | <b>0.559</b>  | 0.432, 0.722 | -            |              |
| Replacement/substitution | -            |              | <b>0.529</b> | 0.448, 0.624 | <b>0.790</b> | 0.714, 0.874 | <b>0.333</b> | 0.242, 0.458 | <b>0.544</b>  | 0.421, 0.704 | <b>1.026</b> | 1.015, 1.037 |

**Variable Group 3**

|                          | Sedentary    |              | Light        |              | Moderate-vigorous |              | Total time   |              |
|--------------------------|--------------|--------------|--------------|--------------|-------------------|--------------|--------------|--------------|
|                          | HR           | 95% CI       | HR           | 95% CI       | HR                | 95% CI       | HR           | 95% CI       |
| <b>ALL Participants</b>  |              |              |              |              |                   |              |              |              |
| Partition                | <b>1.021</b> | 1.014, 1.028 | <b>0.830</b> | 0.771, 0.895 | <b>0.590</b>      | 0.554, 0.628 | -            |              |
| Replacement/substitution | -            |              | <b>0.813</b> | 0.754, 0.877 | <b>0.578</b>      | 0.542, 0.615 | <b>1.021</b> | 1.014, 1.028 |
| <b>MEN</b>               |              |              |              |              |                   |              |              |              |
| Partition                | <b>1.018</b> | 1.009, 1.027 | <b>0.852</b> | 0.764, 0.949 | <b>0.617</b>      | 0.573, 0.664 | -            |              |
| Replacement/substitution | -            |              | <b>0.837</b> | 0.750, 0.933 | <b>0.606</b>      | 0.563, 0.653 | <b>1.018</b> | 1.009, 1.027 |
| <b>WOMEN</b>             |              |              |              |              |                   |              |              |              |
| Partition                | <b>1.026</b> | 1.015, 1.037 | <b>0.802</b> | 0.723, 0.889 | <b>0.528</b>      | 0.467, 0.596 | -            |              |
| Replacement/substitution | -            |              | <b>0.782</b> | 0.704, 0.868 | <b>0.514</b>      | 0.455, 0.581 | <b>1.028</b> | 1.017, 1.038 |

Partition Models adjusted for each type of activity indicated (hrs/d), as well as Age (years), Education (< 12 yrs, high school graduate, some college, college graduate, unknown), Smoking history (never, stopped 10+ , stopped 5-9, stopped 1-4 years, stopped < 1 year, current smoker, unknown), Sleep duration (< 4, 4-5.9, 6-7.9, 8-9.9, 10+ hours/day, unknown), Overall health (excellent, very good, good, fair, Replacement/substitution models include each type of activity, total time (sum of active and sedentary) and the covariates listed above.

**Supplementary Digital Content: Table 1 B.** Partition and isotemporal substitution models for all-cause mortality in more active participants, overall and by sex - the NIH-AARP Diet & Health Study

**More Overall Physical Activity (2+ hrs/d)**

| <u>Variable Group 1</u>  | <u>Sitting</u> |              | <u>Exercise</u> |              | <u>Non-exercise</u>      |              | <u>Total time</u>  |              |                      |              |                   |              |
|--------------------------|----------------|--------------|-----------------|--------------|--------------------------|--------------|--------------------|--------------|----------------------|--------------|-------------------|--------------|
|                          | HR             | 95% CI       | HR              | 95% CI       | HR                       | 95% CI       | HR                 | 95% CI       |                      |              |                   |              |
| <b>ALL Participants</b>  |                |              |                 |              |                          |              |                    |              |                      |              |                   |              |
| Partition                | <b>1.016</b>   | 1.008, 1.023 | <b>0.922</b>    | 0.892, 0.954 | <b>1.016</b>             | 0.996, 1.035 | -                  |              |                      |              |                   |              |
| Replacement/substitution | -              |              | <b>0.908</b>    | 0.877, 0.940 | <b>1.000</b>             | 0.979, 1.021 | <b>1.016</b>       | 1.008, 1.023 |                      |              |                   |              |
| <b>MEN</b>               |                |              |                 |              |                          |              |                    |              |                      |              |                   |              |
| Partition                | <b>1.010</b>   | 0.999, 1.020 | <b>0.92</b>     | 0.882, 0.960 | <b>1.031</b>             | 1.006, 1.057 | -                  |              |                      |              |                   |              |
| Replacement/substitution | -              |              | <b>0.911</b>    | 0.872, 0.952 | <b>1.021</b>             | 0.994, 1.049 | <b>1.010</b>       | 0.999, 1.020 |                      |              |                   |              |
| <b>WOMEN</b>             |                |              |                 |              |                          |              |                    |              |                      |              |                   |              |
| Partition                | <b>1.024</b>   | 1.013, 1.036 | <b>0.933</b>    | 0.881, 0.988 | <b>0.99</b>              | 0.959, 1.021 | -                  |              |                      |              |                   |              |
| Replacement/substitution | -              |              | <b>0.911</b>    | 0.860, 0.966 | <b>0.966</b>             | 0.935, 0.999 | <b>1.024</b>       | 1.013, 1.036 |                      |              |                   |              |
| <u>Variable Group 2</u>  | <u>Sitting</u> |              | <u>Exercise</u> |              | <u>Household</u>         |              | <u>Lawn/garden</u> |              | <u>Other walking</u> |              | <u>Total time</u> |              |
|                          | HR             | 95% CI       | HR              | 95% CI       | HR                       | 95% CI       | HR                 | 95% CI       | HR                   | 95% CI       | HR                | 95% CI       |
| <b>ALL Participants</b>  |                |              |                 |              |                          |              |                    |              |                      |              |                   |              |
| Partition                | <b>1.015</b>   | 1.008, 1.023 | <b>0.923</b>    | 0.892, 0.955 | <b>1.037</b>             | 1.008, 1.068 | <b>0.98</b>        | 0.940, 1.021 | <b>1.008</b>         | 0.951, 1.070 | -                 |              |
| Replacement/substitution | -              |              | <b>0.909</b>    | 0.878, 0.942 | <b>1.022</b>             | 0.991, 1.053 | <b>0.965</b>       | 0.925, 1.006 | <b>0.993</b>         | 0.936, 1.054 | <b>1.015</b>      | 1.008, 1.023 |
| <b>MEN</b>               |                |              |                 |              |                          |              |                    |              |                      |              |                   |              |
| Partition                | <b>1.009</b>   | 0.999, 1.019 | <b>0.922</b>    | 0.884, 0.962 | <b>1.08</b>              | 1.040, 1.122 | <b>0.969</b>       | 0.922, 1.018 | <b>1.012</b>         | 0.935, 1.095 | -                 |              |
| Replacement/substitution | -              |              | <b>0.914</b>    | 0.875, 0.955 | <b>1.071</b>             | 1.029, 1.114 | <b>0.96</b>        | 0.913, 1.010 | <b>1.003</b>         | 0.926, 1.086 | <b>1.009</b>      | 0.999, 1.019 |
| <b>WOMEN</b>             |                |              |                 |              |                          |              |                    |              |                      |              |                   |              |
| Partition                | <b>1.024</b>   | 1.012, 1.036 | <b>0.932</b>    | 0.879, 0.987 | <b>0.985</b>             | 0.942, 1.030 | <b>0.986</b>       | 0.912, 1.067 | <b>1.011</b>         | 0.924, 1.106 | -                 |              |
| Replacement/substitution | -              |              | <b>0.91</b>     | 0.858, 0.965 | <b>0.962</b>             | 0.918, 1.007 | <b>0.963</b>       | 0.890, 1.042 | <b>0.987</b>         | 0.901, 1.081 | <b>1.024</b>      | 1.012, 1.036 |
| <u>Variable Group 3</u>  | <u>Sitting</u> |              | <u>Light</u>    |              | <u>Moderate-vigorous</u> |              | <u>Total time</u>  |              |                      |              |                   |              |
|                          | HR             | 95% CI       | HR              | 95% CI       | HR                       | 95% CI       | HR                 | 95% CI       |                      |              |                   |              |
| <b>ALL Participants</b>  |                |              |                 |              |                          |              |                    |              |                      |              |                   |              |
| Partition                | <b>1.015</b>   | 1.007, 1.023 | <b>1.059</b>    | 1.021, 1.099 | <b>0.973</b>             | 0.952, 0.995 | -                  |              |                      |              |                   |              |
| Replacement/substitution | -              |              | <b>1.044</b>    | 1.005, 1.084 | <b>0.959</b>             | 0.937, 0.982 | <b>1.021</b>       | 1.014, 1.028 |                      |              |                   |              |
| <b>MEN</b>               |                |              |                 |              |                          |              |                    |              |                      |              |                   |              |
| Partition                | <b>1.008</b>   | 0.997, 1.018 | <b>1.139</b>    | 1.087, 1.194 | <b>0.966</b>             | 0.939, 0.994 | -                  |              |                      |              |                   |              |
| Replacement/substitution | -              |              | <b>1.131</b>    | 1.076, 1.187 | <b>0.958</b>             | 0.930, 0.988 | <b>1.008</b>       | 0.997, 1.018 |                      |              |                   |              |
| <b>WOMEN</b>             |                |              |                 |              |                          |              |                    |              |                      |              |                   |              |
| Partition                | <b>1.024</b>   | 1.013, 1.036 | <b>0.958</b>    | 0.904, 1.015 | <b>0.985</b>             | 0.952, 1.020 | -                  |              |                      |              |                   |              |
| Replacement/substitution | -              |              | <b>0.935</b>    | 0.881, 0.992 | <b>0.962</b>             | 0.927, 0.997 | <b>1.024</b>       | 1.013, 1.036 |                      |              |                   |              |

Partition Models adjusted for each type of activity indicated (hrs/d), as well as Age (years), Education (< 12 yrs, high school graduate, some college, college graduate, unknown), Smoking history (never, stopped 10+ , stopped 5-9, stopped 1-4 years, stopped < 1 year, current smoker, unknown), Sleep duration (< 4, 4-5.9, 6-7.9, 8-9.9, 10+ hours/day, unknown), Overall health (excellent, very good, good, fair, poor, unknown), Body Mass Index (< 25, 25-29.9, 30+ kg/m2, unknown), and Sex among All Participants  
 Replacement/substitution models include each type of activity, total time (sum of active and sedentary) and the covariates listed above.
