# Supplementary material
Source: PubMed Central journal article supplement (PMC4515413)
Supplement: NIHMS656264-supplement-SDC_7.pdf [file NIHMS656264-supplement-SDC_7.pdf]

**Supplementary Digital Content: Table 2 A.** Partition and isotemporal substitution models for cardiovascular mortality in less active participants, overall and by sex - the NIH-AARP Diet & Health Study

|                                                      |  | <b>CVD</b>       |               |                 |               |                          |               |                    |               |                      |               |                   |               |
|------------------------------------------------------|--|------------------|---------------|-----------------|---------------|--------------------------|---------------|--------------------|---------------|----------------------|---------------|-------------------|---------------|
| <b>Less Overall Physical Activity (&lt; 2 hrs/d)</b> |  | <b>Sedentary</b> |               | <b>Exercise</b> |               | <b>Non-exercise</b>      |               | <b>Total time</b>  |               |                      |               |                   |               |
| <b>Variable Group 1</b>                              |  | <b>HR</b>        | <b>95% CI</b> | <b>HR</b>       | <b>95% CI</b> | <b>HR</b>                | <b>95% CI</b> | <b>HR</b>          | <b>95% CI</b> |                      |               |                   |               |
| <b>ALL Participants</b>                              |  |                  |               |                 |               |                          |               |                    |               |                      |               |                   |               |
| Partition                                            |  | <b>1.023</b>     | 1.010, 1.037  | <b>0.483</b>    | 0.411, 0.568  | <b>0.650</b>             | 0.587, 0.721  | -                  |               |                      |               |                   |               |
| Replacement/substitution                             |  | -                |               | <b>0.472</b>    | 0.402, 0.555  | <b>0.635</b>             | 0.573, 0.705  | <b>1.023</b>       |               | 1.010, 1.037         |               |                   |               |
| <b>MEN</b>                                           |  |                  |               |                 |               |                          |               |                    |               |                      |               |                   |               |
| Partition                                            |  | <b>1.026</b>     | 1.009, 1.043  | <b>0.494</b>    | 0.409, 0.595  | <b>0.724</b>             | 0.635, 0.825  | -                  |               |                      |               |                   |               |
| Replacement/substitution                             |  | -                |               | <b>0.481</b>    | 0.399, 0.580  | <b>0.706</b>             | 0.619, 0.805  | <b>1.026</b>       |               | 1.009, 1.043         |               |                   |               |
| <b>WOMEN</b>                                         |  |                  |               |                 |               |                          |               |                    |               |                      |               |                   |               |
| Partition                                            |  | <b>1.02</b>      | 0.999, 1.042  | <b>0.465</b>    | 0.335, 0.644  | <b>0.55</b>              | 0.466, 0.649  | -                  |               |                      |               |                   |               |
| Replacement/substitution                             |  | -                |               | <b>0.455</b>    | 0.329, 0.631  | <b>0.539</b>             | 0.456, 0.637  | <b>1.02</b>        |               | 0.999, 1.042         |               |                   |               |
| <b>Variable Group 2</b>                              |  | <b>Sedentary</b> |               | <b>Exercise</b> |               | <b>Household</b>         |               | <b>Lawn/garden</b> |               | <b>Other walking</b> |               | <b>Total time</b> |               |
|                                                      |  | <b>HR</b>        | <b>95% CI</b> | <b>HR</b>       | <b>95% CI</b> | <b>HR</b>                | <b>95% CI</b> | <b>HR</b>          | <b>95% CI</b> | <b>HR</b>            | <b>95% CI</b> | <b>HR</b>         | <b>95% CI</b> |
| <b>ALL Participants</b>                              |  |                  |               |                 |               |                          |               |                    |               |                      |               |                   |               |
| Partition                                            |  | <b>1.021</b>     | 1.008, 1.035  | <b>0.48</b>     | 0.409, 0.565  | <b>0.769</b>             | 0.671, 0.881  | <b>0.395</b>       | 0.305, 0.512  | <b>0.654</b>         | 0.489, 0.875  | -                 |               |
| Replacement/substitution                             |  | -                |               | <b>0.471</b>    | 0.400, 0.553  | <b>0.753</b>             | 0.657, 0.863  | <b>0.387</b>       | 0.299, 0.501  | <b>0.641</b>         | 0.479, 0.857  | <b>1.021</b>      | 1.008, 1.035  |
| <b>MEN</b>                                           |  |                  |               |                 |               |                          |               |                    |               |                      |               |                   |               |
| Partition                                            |  | <b>1.023</b>     | 1.009, 1.027  | <b>0.49</b>     | 0.407, 0.591  | <b>0.887</b>             | 0.734, 1.070  | <b>0.449</b>       | 0.339, 0.595  | <b>0.849</b>         | 0.601, 1.201  | -                 |               |
| Replacement/substitution                             |  | -                |               | <b>0.479</b>    | 0.397, 0.578  | <b>0.867</b>             | 0.717, 1.048  | <b>0.439</b>       | 0.332, 0.581  | <b>0.83</b>          | 0.586, 1.175  | <b>1.023</b>      | 1.006, 1.040  |
| <b>WOMEN</b>                                         |  |                  |               |                 |               |                          |               |                    |               |                      |               |                   |               |
| Partition                                            |  | <b>1.018</b>     | 0.997, 1.039  | <b>0.478</b>    | 0.345, 0.662  | <b>0.674</b>             | 0.555, 0.819  | <b>0.179</b>       | 0.090, 0.355  | <b>0.387</b>         | 0.230, 0.652  | -                 |               |
| Replacement/substitution                             |  | -                |               | <b>0.469</b>    | 0.339, 0.650  | <b>0.662</b>             | 0.545, 0.806  | <b>0.176</b>       | 0.088, 0.349  | <b>0.38</b>          | 0.226, 0.641  | <b>1.018</b>      | 0.997, 1.039  |
| <b>Variable Group 3</b>                              |  | <b>Sedentary</b> |               | <b>Light</b>    |               | <b>Moderate-vigorous</b> |               | <b>Total time</b>  |               |                      |               |                   |               |
|                                                      |  | <b>HR</b>        | <b>95% CI</b> | <b>HR</b>       | <b>95% CI</b> | <b>HR</b>                | <b>95% CI</b> | <b>HR</b>          | <b>95% CI</b> |                      |               |                   |               |
| <b>ALL Participants</b>                              |  |                  |               |                 |               |                          |               |                    |               |                      |               |                   |               |
| Partition                                            |  | <b>1.021</b>     | 1.008, 1.035  | <b>0.774</b>    | 0.673, 0.891  | <b>0.501</b>             | 0.444, 0.565  | -                  |               |                      |               |                   |               |
| Replacement/substitution                             |  | -                |               | <b>0.758</b>    | 0.658, 0.873  | <b>0.491</b>             | 0.435, 0.553  | <b>1.021</b>       |               | 1.008, 1.035         |               |                   |               |
| <b>MEN</b>                                           |  |                  |               |                 |               |                          |               |                    |               |                      |               |                   |               |
| Partition                                            |  | <b>1.022</b>     | 1.006, 1.040  | <b>0.955</b>    | 0.788, 1.156  | <b>0.528</b>             | 0.460, 0.608  | -                  |               |                      |               |                   |               |
| Replacement/substitution                             |  | -                |               | <b>0.934</b>    | 0.769, 1.133  | <b>0.517</b>             | 0.450, 0.594  | <b>1.022</b>       |               | 1.006, 1.040         |               |                   |               |
| <b>WOMEN</b>                                         |  |                  |               |                 |               |                          |               |                    |               |                      |               |                   |               |
| Partition                                            |  | <b>1.019</b>     | 0.998, 1.040  | <b>0.626</b>    | 0.511, 0.766  | <b>0.432</b>             | 0.340, 0.548  | -                  |               |                      |               |                   |               |
| Replacement/substitution                             |  | -                |               | <b>0.614</b>    | 0.501, 0.754  | <b>0.424</b>             | 0.334, 0.538  | <b>1.019</b>       |               | 0.998, 1.040         |               |                   |               |

Partition Models adjusted for each type of activity indicated (hrs/d), as well as Age (years), Education (< 12 yrs, high school graduate, some college, college graduate, unknown), Smoking history (never, stopped 10+ , stopped 5-9, stopped 1-4 years, stopped < 1 year, current smoker, unknown), Sleep duration (< 4, 4-5.9, 6-7.9, 8-9.9, 10+ hours/day, unknown), Overall health (excellent, very good, good, fair, poor, unknown), Body Mass Index (< 25, 25-29.9, 30+ kg/m2, unknown), and Sex among All Participants  
Replacement/substitution models include each type of activity, total time (sum of active and sedentary) and the covariates listed above.

**Supplementary Table 2 B.** Partition and isotemporal substitution models for cardiovascular mortality in more active participants, overall and by sex - the NIH-AARP Diet & Health Study

**Less Overall Physical Activity (< 2 hrs/d)**

**CVD**

**Variable Group 1**

|                          | Sedentary    |              | Exercise     |              | Non-exercise |              | Total time   |              |
|--------------------------|--------------|--------------|--------------|--------------|--------------|--------------|--------------|--------------|
|                          | HR           | 95% CI       |
| <b>ALL Participants</b>  |              |              |              |              |              |              |              |              |
| Partition                | <b>1.026</b> | 1.011, 1.041 | <b>0.858</b> | 0.800, 0.920 | <b>1.027</b> | 0.989, 1.067 | -            |              |
| Replacement/substitution | -            |              | <b>0.836</b> | 0.778, 0.898 | <b>1.001</b> | 0.961, 1.043 | <b>1.026</b> | 1.011, 1.041 |
| <b>MEN</b>               |              |              |              |              |              |              |              |              |
| Partition                | <b>1.014</b> | 0.994,1.034  | <b>0.847</b> | 0.777, 0.924 | <b>1.032</b> | 0.983, 1.083 | -            |              |
| Replacement/substitution | -            |              | <b>0.836</b> | 0.765, 0.913 | <b>1.018</b> | 0.966, 1.073 | <b>1.014</b> | 0.994, 1.034 |
| <b>WOMEN</b>             |              |              |              |              |              |              |              |              |
| Partition                | <b>1.044</b> | 1.021, 1.067 | <b>0.877</b> | 0.777, 0.990 | <b>1.016</b> | 0.955, 1.081 | -            |              |
| Replacement/substitution | -            |              | <b>0.840</b> | 0.743, 0.950 | <b>0.974</b> | 0.911, 1.040 | <b>1.044</b> | 1.021, 1.067 |

**Variable Group 2**

|                          | Sedentary    |              | Exercise     |              | Household    |              | Lawn/garden  |              | Other walking |              | Total time   |              |
|--------------------------|--------------|--------------|--------------|--------------|--------------|--------------|--------------|--------------|---------------|--------------|--------------|--------------|
|                          | HR           | 95% CI       | HR            | 95% CI       | HR           | 95% CI       |
| <b>ALL Participants</b>  |              |              |              |              |              |              |              |              |               |              |              |              |
| Partition                | <b>1.025</b> | 1.010, 1.040 | <b>0.861</b> | 0.802, 0.923 | <b>1.085</b> | 1.026, 1.148 | <b>0.944</b> | 0.869, 1.025 | <b>0.99</b>   | 0.881, 1.114 | -            |              |
| Replacement/substitution | -            |              | <b>0.840</b> | 0.781, 0.902 | <b>1.059</b> | 0.999, 1.123 | <b>0.921</b> | 0.847, 1.001 | <b>0.966</b>  | 0.858, 1.089 | <b>1.025</b> | 1.010, 1.040 |
| <b>MEN</b>               |              |              |              |              |              |              |              |              |               |              |              |              |
| Partition                | <b>1.012</b> | 0.992, 1.032 | <b>0.851</b> | 0.781, 0.928 | <b>1.141</b> | 1.062, 1.225 | <b>0.9</b>   | 0.815, 0.994 | <b>0.975</b>  | 0.834, 1.139 | -            |              |
| Replacement/substitution | -            |              | <b>0.841</b> | 0.770, 0.919 | <b>1.127</b> | 1.046, 1.215 | <b>0.89</b>  | 0.805, 0.983 | <b>0.963</b>  | 0.823, 1.128 | <b>1.012</b> | 0.992, 1.032 |
| <b>WOMEN</b>             |              |              |              |              |              |              |              |              |               |              |              |              |
| Partition                | <b>1.044</b> | 1.021, 1.067 | <b>0.876</b> | 0.775, 0.989 | <b>1.005</b> | 0.919, 1.100 | <b>1.037</b> | 0.890, 1.208 | <b>1.027</b>  | 0.857, 1.231 | -            |              |
| Replacement/substitution | -            |              | <b>0.839</b> | 0.741, 0.949 | <b>0.963</b> | 0.877, 1.057 | <b>0.993</b> | 0.852, 1.158 | <b>0.983</b>  | 0.818, 1.182 | <b>1.044</b> | 1.021, 1.067 |

**Variable Group 3**

|                          | Sedentary    |              | Light        |              | Moderate-vigorous |              | Total time   |              |
|--------------------------|--------------|--------------|--------------|--------------|-------------------|--------------|--------------|--------------|
|                          | HR           | 95% CI       | HR           | 95% CI       | HR                | 95% CI       | HR           | 95% CI       |
| <b>ALL Participants</b>  |              |              |              |              |                   |              |              |              |
| Partition                | <b>1.024</b> | 1.010, 1.040 | <b>1.112</b> | 1.035, 1.195 | <b>0.951</b>      | 0.910, 0.993 | -            |              |
| Replacement/substitution | -            |              | <b>1.086</b> | 1.008, 1.170 | <b>0.928</b>      | 0.887, 0.972 | <b>1.024</b> | 1.010, 1.040 |
| <b>MEN</b>               |              |              |              |              |                   |              |              |              |
| Partition                | <b>1.01</b>  | 0.990, 1.030 | <b>1.222</b> | 1.116, 1.337 | <b>0.923</b>      | 0.873, 0.977 | -            |              |
| Replacement/substitution | -            |              | <b>1.210</b> | 1.101, 1.329 | <b>0.914</b>      | 0.862, 0.970 | <b>1.01</b>  | 0.990, 1.030 |
| <b>WOMEN</b>             |              |              |              |              |                   |              |              |              |
| Partition                | <b>1.045</b> | 1.022, 1.068 | <b>0.957</b> | 0.852, 1.076 | <b>0.998</b>      | 0.931, 1.069 | -            |              |
| Replacement/substitution | -            |              | <b>0.917</b> | 0.813, 1.034 | <b>0.955</b>      | 0.888, 1.027 | <b>1.045</b> | 1.022, 1.068 |

Partition Models adjusted for each type of activity indicated (hrs/d), as well as Age (years), Education (< 12 yrs, high school graduate, some college, college graduate, unknown), Smoking history (never, stopped 10+ , stopped 5-9, stopped 1-4 years, stopped < 1 year, current smoker, unknown), Sleep duration (< 4, 4-5.9, 6-7.9, 8-9.9, 10+ hours/day, unknown), Overall health (excellent, very good, good, fair, poor, unknown), Body Mass Index (< 25, 25-29.9, 30+ kg/m2, unknown), and Sex among All Participants  
Replacement/substitution models include each type of activity, total time (sum of active and sedentary) and the covariates listed above.
