# Supplementary material
Source: PubMed Central journal article supplement (PMC4515413)
Supplement: NIHMS656264-supplement-SDC_8.pdf [file NIHMS656264-supplement-SDC_8.pdf]

**Supplementary Digital Content: Table 3.** Cause-specific mortality and sedentary behavior after excluding short follow-up (< 2 person-yrs), by sex - the NIH Diet & Health Study

|                       | Men           |        |              | Women         |        |              |
|-----------------------|---------------|--------|--------------|---------------|--------|--------------|
|                       | Deaths<br>(n) | HR     | (95% CI)     | Deaths<br>(n) | HR     | (95% CI)     |
| <b>All-causes</b>     |               |        |              |               |        |              |
| < 5                   | 1,485         | 1.00   | -            | 936           | 1.00   | -            |
| 5 to 6.9              | 1,824         | 1.03   | (0.96, 1.10) | 1230          | 1.09   | (1.00, 1.19) |
| 7 to 8.9              | 1,267         | 1.09   | (1.01, 1.17) | 861           | 1.08   | (0.98, 1.19) |
| 9 to 11.9             | 729           | 1.16   | (1.06, 1.27) | 577           | 1.21   | (1.09, 1.34) |
| ≥ 12                  | 680           | 1.18   | (1.08, 1.29) | 629           | 1.35   | (1.22, 1.50) |
| P <sub>trend</sub>    |               | < 0.01 |              |               | < 0.01 |              |
| <b>Cardiovascular</b> |               |        |              |               |        |              |
| < 5                   | 369           | 1.00   | -            | 236           | 1.00   | -            |
| 5 to 6.9              | 495           | 1.10   | (0.96, 1.26) | 306           | 1.07   | (0.90, 1.26) |
| 7 to 8.9              | 350           | 1.18   | (1.01, 1.36) | 205           | 0.99   | (0.82, 1.20) |
| 9 to 11.9             | 208           | 1.29   | (1.09, 1.53) | 170           | 1.36   | (1.12, 1.67) |
| ≥ 12                  | 207           | 1.42   | (1.19, 1.68) | 181           | 1.47   | (1.21, 1.80) |
| P <sub>trend</sub>    |               | < 0.01 |              |               | < 0.01 |              |
| <b>Cancer</b>         |               |        |              |               |        |              |
| < 5                   | 593           | 1.00   | -            | 381           | 1.00   | -            |
| 5 to 6.9              | 697           | 0.99   | (0.89, 1.10) | 479           | 1.07   | (0.93, 1.22) |
| 7 to 8.9              | 454           | 0.99   | (0.88, 1.12) | 307           | 0.98   | (0.84, 1.14) |
| 9 to 11.9             | 273           | 1.12   | (0.97, 1.30) | 188           | 1.02   | (0.85, 1.21) |
| ≥ 12                  | 212           | 0.94   | (0.80, 1.10) | 190           | 1.05   | (0.88, 1.26) |
| P <sub>trend</sub>    |               | 0.99   |              |               | 0.84   |              |
| <b>Other causes</b>   |               |        |              |               |        |              |
| < 5                   | 523           | 1.00   | -            | 319           | 1.00   | -            |
| 5 to 6.9              | 632           | 1.02   | (0.91, 1.15) | 445           | 1.15   | (1.00, 1.33) |
| 7 to 8.9              | 463           | 1.14   | (1.00, 1.29) | 349           | 1.26   | (1.08, 1.48) |
| 9 to 11.9             | 248           | 1.13   | (0.97, 1.31) | 219           | 1.31   | (1.10, 1.57) |
| ≥ 12                  | 261           | 1.28   | (1.10, 1.49) | 358           | 1.61   | (1.35, 1.90) |
| P <sub>trend</sub>    |               | < 0.01 |              |               | < 0.01 |              |

Adjusted for Age (years), Sex (0, 1), Education (< 12 yrs, high school graduate, some college, college graduate, unknown),

Smoking history (never, stopped 10+ , 5-9, 1-4 years ago, stopped < 1 year, current smoker, unknown),

Sleep duration (< 4, 4, 5.9, 6, 7.9, 8, 9.9, 10+ hours/day, unknown), Overall health (excellent, very good, good, fair, poor, unknown),

Body mass index (< 25, 25, 29.9, 30+ kg/m<sup>2</sup>, unknown), and Overall physical activity (hrs/d)
