# Supplementary material
Source: PubMed Central journal article supplement (PMC4515413)
Supplement: NIHMS656264-supplement-SDC_9.pdf [file NIHMS656264-supplement-SDC_9.pdf]

**Supplementary Digital Content: Table 4.** Partition and isotemporal substitution models for mortality in less and more active participants, excluding those with < 2 years of follow-up - the NIH-AARP Diet & Health Study

**Less Overall Physical Activity (< 2 hrs/d)**

|                                 | Sedentary    |              | Exercise     |              | Non-exercise |              | Total time   |              |
|---------------------------------|--------------|--------------|--------------|--------------|--------------|--------------|--------------|--------------|
|                                 | HR           | 95% CI       |
| <b>All-cause mortality</b>      |              |              |              |              |              |              |              |              |
| Partition                       | <b>1.019</b> | 1.011, 1.027 | <b>0.613</b> | 0.560, 0.672 | <b>0.730</b> | 0.686, 0.775 | -            |              |
| Replacement/substitution        | -            |              | <b>0.602</b> | 0.550, 0.659 | <b>0.716</b> | 0.673, 0.761 | <b>1.019</b> | 1.011, 1.027 |
| <b>Cardiovascular mortality</b> |              |              |              |              |              |              |              |              |
| Partition                       | <b>1.023</b> | 1.008, 1.038 | <b>0.483</b> | 0.403, 0.580 | <b>0.675</b> | 0.602, 0.757 | -            |              |
| Replacement/substitution        | -            |              | <b>0.473</b> | 0.394, 0.567 | <b>0.660</b> | 0.588, 0.741 | <b>1.023</b> | 1.008, 1.038 |

**More Overall Physical Activity (≥ 2 hrs/d)**

|                                 | Sedentary    |              | Exercise     |              | Non-exercise |              | Total time   |              |
|---------------------------------|--------------|--------------|--------------|--------------|--------------|--------------|--------------|--------------|
|                                 | HR           | 95% CI       |
| <b>All-cause mortality</b>      |              |              |              |              |              |              |              |              |
| Partition                       | <b>1.014</b> | 1.005, 1.022 | <b>0.933</b> | 0.900, 0.968 | <b>1.013</b> | 0.992, 1.035 | -            |              |
| Replacement/substitution        | -            |              | <b>0.921</b> | 0.887, 0.956 | <b>1.000</b> | 0.977, 1.023 | <b>1.014</b> | 1.005, 1.022 |
| <b>Cardiovascular mortality</b> |              |              |              |              |              |              |              |              |
| Partition                       | <b>1.023</b> | 1.007, 1.040 | <b>0.870</b> | 0.806, 0.938 | <b>1.029</b> | 0.988, 1.073 | -            |              |
| Replacement/substitution        | -            |              | <b>0.850</b> | 0.787, 0.918 | <b>1.006</b> | 0.962, 1.052 | <b>1.023</b> | 1.007, 1.040 |

Partition Models adjusted for each type of activity indicated (hrs/d), as well as Age (years), Education (< 12 yrs, high school graduate, some college, college graduate, unknown),

Smoking history (never, stopped 10+ , stopped 5-9, stopped 1-4 years, stopped < 1 year, current smoker, unknown),

Sleep duration (< 4, 4-5.9, 6-7.9, 8-9.9, 10+ hours/day, unknown), Overall health (excellent, very good, good, fair, poor, unknown), and Body Mass Index (< 25, 25-29.9, 30+ kg/m<sup>2</sup>, unknown), and Sex among All Participants

Replacement/substitution models include each type of activity, total time (sum of active and sedentary) and the covariates listed above.
